# Supplementary material for: Lactobacillus paracasei CCFM1223 Protects against Lipopolysaccharide-Induced Acute Liver Injury in Mice by Regulating the “Gut–Liver” Axis
Source: MDPI journal article supplement (doi:10.3390/microorganisms10071321), 2022-06-30
Supplement: s1 [file s1]

## Supplementary Materials

### Supplementary Material 1:

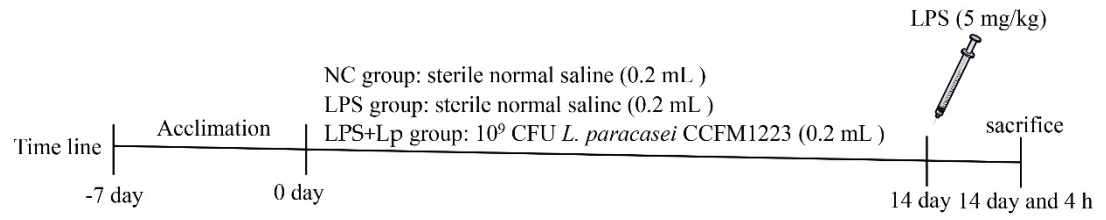

**Figure S1.** Animal model experimental design.

## Supplementary Material 2

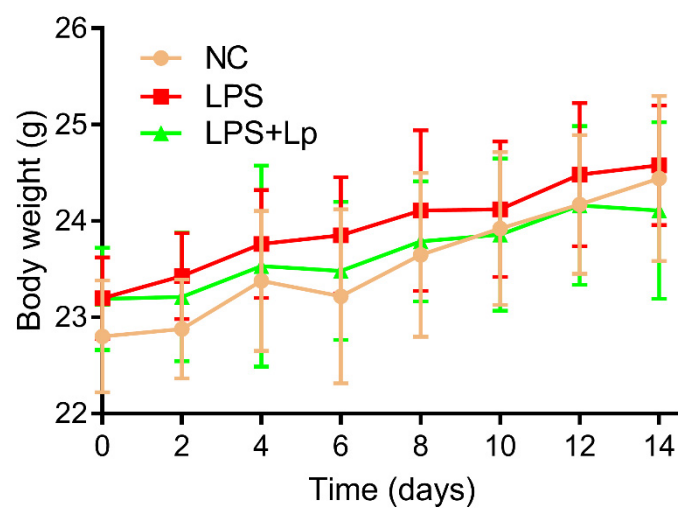

**Figure S2** Effect of *L. paracasei* CCFM1223 on body weight in LPS-treated mice (n = 8).

### Supplementary Material 3:

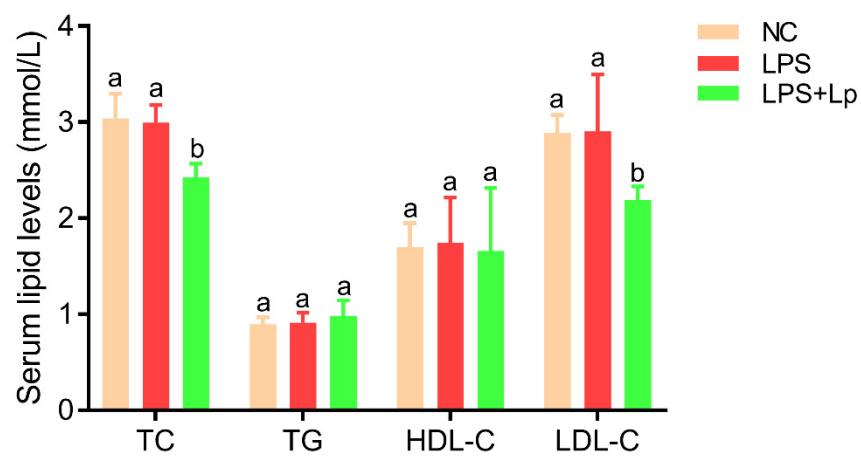

**Figure S3** Effect of *L. paracasei* CCFM1223 on the serum TC, TG, HDL-C, and LDL-C levels in LPS-treated mice (n = 8). Values with different letters are significantly different ( $p < 0.05$ ).

Supplementary Material 4:

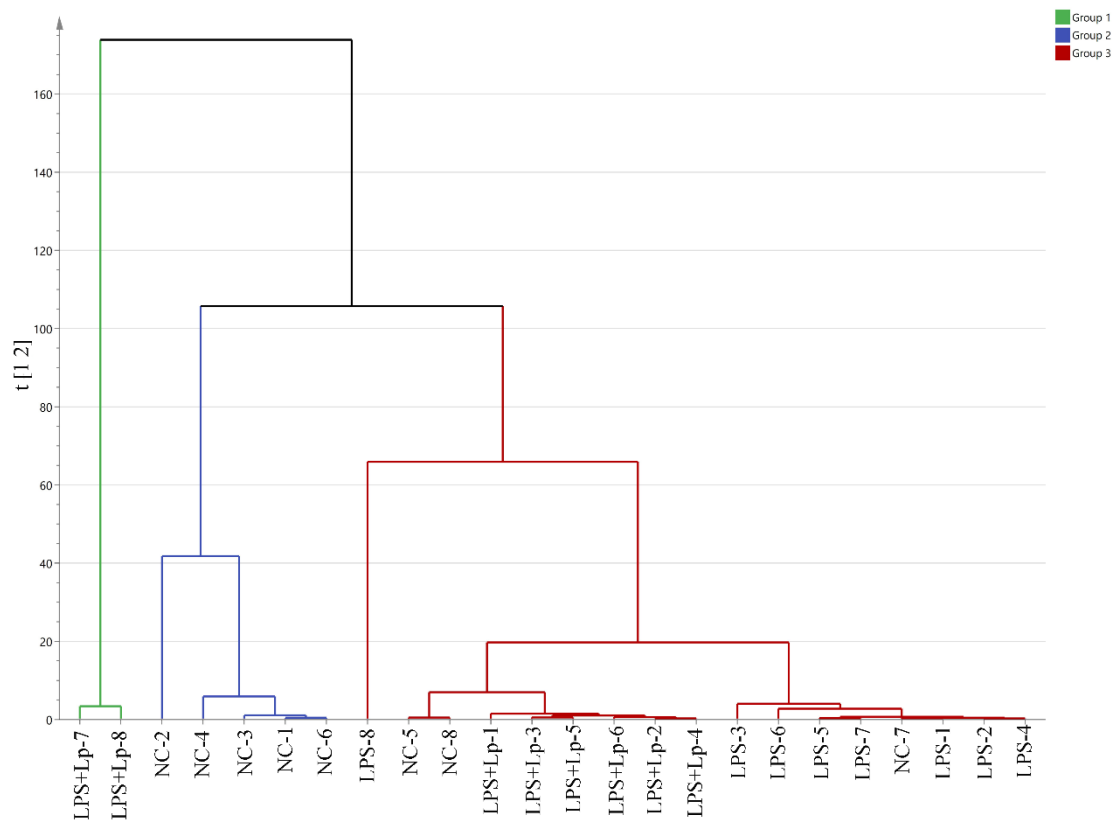

Figure S4 Hierarchical cluster analysis based on the genus level.

Supplementary Material 5:

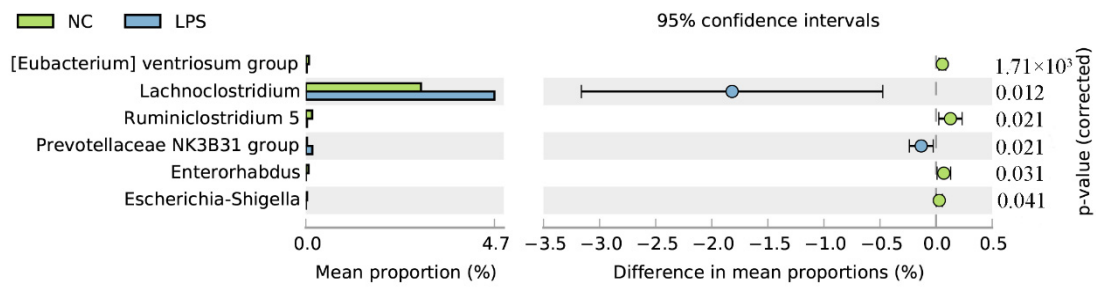

**Figure S5** Extended error bar plot identifying the intestinal microbiota of significant differences between NC and LPS groups.

Supplementary Material 6:

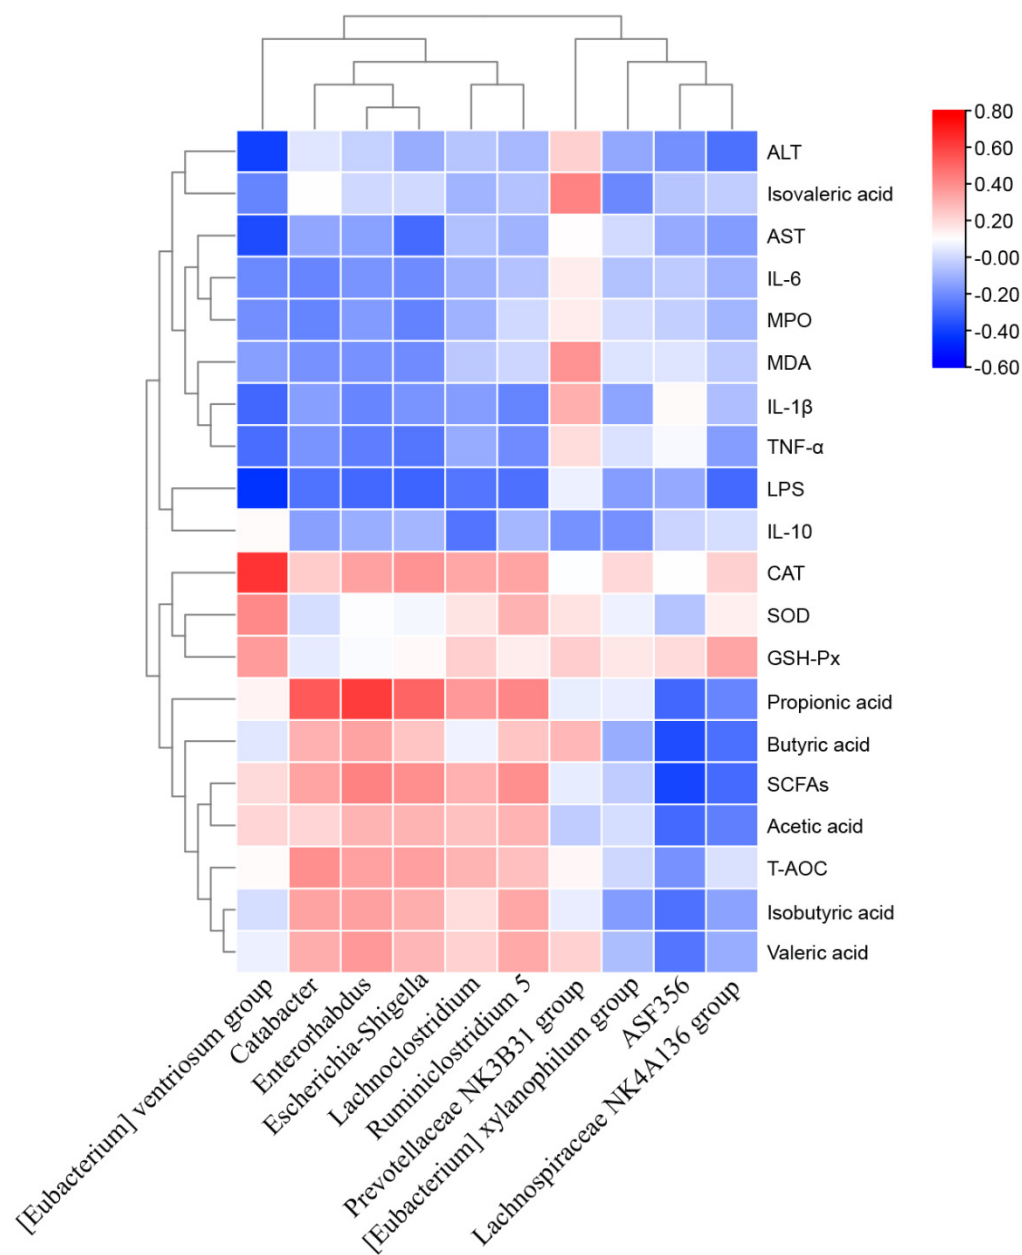

**Figure S6** Heatmap of Spearman's correlation analysis between the key intestinal bacterial phylotypes and parameters of ALI.

## Supplementary Material 7:

**Table S1** Primer sequences for quantitative real-time PCR of hepatic genes.

| Primers | Forward Sequences (5'→3') | Reverse Sequences (5'→3') |
|---------|---------------------------|---------------------------|
| Tlr4    | GGCAGCAGGTGGAATTGTAT      | AGGCCCCAGAGTTTTGTTCT      |
| Tlr9    | CTCCAACCGTATCCACCACC      | GAGAAGTGCAGGGGGCTAAG      |
| Nfr2    | CCTCCGCTGCCATCAGTCAGT     | TCGGCTGGGACTCGTGTTCA      |
| Tak1    | TCAGCACGTTGATCGTTGGT      | TCCATCTGGGCTGGTTAGGA      |
| Iκ-Bα   | ACCAACCAGCCAGAAATCG       | TCACAGGCAAGGTGTAGAGGG     |
| Nf-kβ   | CGCCCCCTTATCGACCACC       | CCTTCTCCCAAGAGTCGTCCA     |
| Nlrp3   | CCCTTTATTTGTACCCAAGGCT    | CGGGCGGGTAATCTTCCAAA      |
| β-actin | GCACCACACCTTCTACAATG      | TGCTTGCTGATCCACATCTG      |
